# Supplementary material
Source: MDPI journal article supplement (https://www.mdpi.com/2073-4395/13/11/2755)
Supplement: s1 [file s1 › agronomy-2695385-supplementary.pdf]

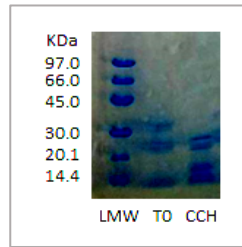

Figure S1. SDS-PAGE of hydrolysed protein from cold crambe defatted seed meal. LMW, low molecular weight marker (kDa); T0, protein extract before enzyme addition; CCH, final cold crambe hydrolysate.
